# Supplementary material for: Tesofensine, a novel antiobesity drug, silences GABAergic hypothalamic neurons
Source: PubMed Central journal article supplement (PMC11042726; doi:10.1371/journal.pone.0300544), 2024-04-24
Supplement: pone.0300544.s014.pdf [file pone.0300544.s014.pdf]

```
%% Laboratory of Neurobiology of Appetite, Department of Pharmacology,  
%CINVESTAV, México  
  
% PhD Ranier Gutierrez, ranier@cinvestav.mx  
  
% Axel Lopez, Claudia I. Perez and Ranier Gutierrez wrote the code  
  
% This MATLAB code is generated according to what is published in the book: "DRUG  
SYNERGISM and DOSE-EFFECT  
  
% DATA ANALYSIS", Author Ronald J Tallarida  
  
  
% If you use this code please cite the following manuscript  
  
% Tesofensine, a novel antiobesity drug, silences GABAergic hypothalamic neurons  
  
% Claudia I. Perez, Jorge Luis-Islas, Axel Lopez, Xareny Diaz, Omar Molina, Benjamin  
%Arroyo, Mario G. Moreno, Elvi Gil Lievana, Esmeralda Fonseca, Gilberto Castañeda-  
%Hernández, and Ranier Gutierrez  
  
% bioRxiv 2023.08.02.551706; doi: https://doi.org/10.1101/2023.08.02.551706  
  
  
  
% Data %%%  
  
% To generate the dose-response curve, its necessary to evaluate the effect  
  
% at different doses for DrugA and DrugB. The data that you need to add in this code:  
  
% DosesA: Doses of drug A, [0.5 1.8 7 26.6 100]. Example 0.5, 1.8, 7, 26.6, and 100  
  
% DosesB: Doses of drug B, [0.1 0.26 0.71 1.9 5].  
  
% EffectA: Effective dose of drug A at doses used.  
  
% EffectB: Effective dose of drug B.  
  
% CombinationC: Doses of the combination C, according to effective doses of DrugA  
and DrugB)  
  
% EffectCombinationC: Effect doses of the combination C.  
  
% ratio: '0.50'; '0.25'; or '0.75' (1:1, 1:3,3:1 ratio, respectively).
```

% ED: '30'; '40'; or '50'. Effective level select and this value would be expected to give  
%the desired effect: ED30, ED40, ED50, etc).

% We use the example from Tallarida (Chapter 4), that the ratio is 1:1 and

% ED50. See excel "Raw-data-to-matlab".

```
DoseA =[1.138 3.793 11.38 37.93];
```

```
EffectA =[19.67 40.32 61.91 88.52];
```

```
DoseB = [0.8 2.667 7.998 26.66];
```

```
EffectB = [19.79 31.4 74.92 92.41];
```

```
CombinationC = [1.19 2.38 4.76];
```

```
EffectCombinationC = [38.96 65.98 92.04];
```

```
ratio = input('Ratio that will be use: '); %0.5
```

```
ED = input('Effective doses: '); %50
```

```
%Ratio that will be use: 1:1
```

```
%Effective doses: 50
```

```
%% Calculate the effective doses
```

```
LogDoseA = log10(DoseA);
```

```
LogDoseB = log10(DoseB);
```

```
LogCombinationC = log10(CombinationC);
```

```
xA = mean(LogDoseA);
```

```
xB = mean(LogDoseB);
```

```
xC = mean(LogCombinationC);
```

```
yA = mean(EffectA);
```

```
yB = mean(EffectB);
```

```
yC = mean(EffectCombinationC);
```

```
DoseANum = length(DoseA);
```

```
DoseBNum = length(DoseB);
```

```
CombinationCNum = length(CombinationC);
```

```
LogDoseB = LogDoseB';
```

```
EffectB = EffectB';
```

```
LogDoseA = LogDoseA';
```

```
EffectA = EffectA';
```

```
LogCombinationC = LogCombinationC';
```

```
EffectCombinationC = EffectCombinationC';
```

```
%linear regression equations  $y = mx + b$ , model = fitlm(LogDoseA,EffectA);
```

```
EcA = [LogDoseA ones(size(LogDoseA))];
```

```
[m_bA,BintA,RA,A,statsA] = regress(EffectA,EcA);
```

```
SlopeA= m_bA(1);
```

```
InterceptA = m_bA(2);
```

```
R2A =statsA(1);
```

```
EcB = [LogDoseB ones(size(LogDoseB))];
```

```

[m_bB,~,~,~,statsB]= regress(EffectB,EcB);
SlopeB= m_bB(1);
InterceptB = m_bB(2);
R2B =statsB(1);

% plotear
% x = min(LogDoseA) : .1 : max(LogDoseA);
% y = m_bB(1)*x +m_bB(2);
% plot(x,y,'m:','linew',6) hold on
% legend({'regression lineal'},'location','northwest')

EcC = [LogCombinationC ones(size(LogCombinationC))];
[m_bC,BintC,RC,C,statsC] = regress(EffectCombinationC,EcC);
SlopeC= m_bC(1);
InterceptC = m_bC(2);
R2C =statsC(1);

% Standard error of estimate
s2A = statsA(4);
s2B = statsB(4);
s2C = statsC(4);

% Estimated regression line for DrugA, DrugB and CombinationC
LEDA = (ED-InterceptA)/ SlopeA;

```

IEDB = (ED-InterceptB)/ SlopeB;

IEDC = (ED-InterceptC)/ SlopeC;

% This is the value of the effective dose of DrugA and DrugB at determinate

% ratio (ED30, ED50, etc)

EDDrugA = 10^IEDA;

EDDrugB = 10^IEDB;

EDC = 10^IEDC; %Zmix

SSregA = sum((LogDoseA-xA).^2);

SSregB = sum((LogDoseB-xB).^2);

SSregC = sum((LogCombinationC-xC).^2);

% The variance of Log Doses (VlogDEA)

VlogDEA = (s2A/SlopeA^2)\*((1/DoseANum)+((IEDA-xA)^2)/SSregA);

VlogDEB = (s2B/SlopeB^2)\*((1/DoseBNum)+((IEDB-xB)^2)/SSregB);

VlogDEC = (s2C/SlopeC^2)\*((1/CombinationCNum)+((IEDC-xC)^2)/SSregC);

% Standard error variances eeLOGDE (SE(logDE50))

EEIEDA = sqrt(VlogDEA);

EEIEDB = sqrt(VlogDEB);

EEIEDC = sqrt(VlogDEC);

## Example

From Tallarida (2000). Book "DRUG SYNERGISM and DOSE-EFFECT DATA ANALYSIS, Chapter 4 "Calculations for the combination Drug Analysis"

### DOSES EFFECT DATA FOR 2 DRUGS

#### DRUG A

| Doses A | Effect A |
|---------|----------|
| 1.138   | 19.67    |
| 3.793   | 40.32    |
| 11.38   | 61.91    |
| 37.93   | 88.52    |

#### DRUG B

| Doses B | Effect B |
|---------|----------|
| 0.8     | 19.79    |
| 2.667   | 31.4     |
| 7.998   | 74.92    |
| 26.66   | 92.41    |

#### COMBINATION C

Effective level select: example 50 (ED50)

For ratio 3:1,  $f = 0.25$ , Equation  $f(ED50DrugA) - (1-f)(ED50DrugB)$

For ratio: 1:3,  $f = 0.75$

For ratio 1:1,  $f = 0.50$

#### Ratio 1:1

|        | Doses C | Effect C |
|--------|---------|----------|
| ED50/4 | 1.19    | 38.96    |
| ED50/2 | 2.38    | 65.98    |
| ED50   | 4.76    | 92.04    |

DrugA:  $Y = 15.64 + 45.21 \log(\text{dose})$ ,  $\log DrugA = 0.76 \pm 0.0234$ , **ED50(DrugA) = 5.754 ± 0.310**

DrugB:  $Y = 20.36 + 51.58 \log(\text{dose})$ ,  $\log DrugB = 0.5746 \pm 0.0994$ , **ED50(DrugB) = 3.755 ± 0.858**

CombinationC:  $Y = 32.46 + 88.16 \log(\text{doseC})$ ,  $\log(\text{CombinationC}) = 0.1989 \pm 0.00317$ , **Zmix = 1.581 ± 0.01151**
